# Supplementary material for: Targeting long non-coding RNA MALAT1 reverses cancerous phenotypes of breast cancer cells through microRNA-561-3p/TOP2A axis
Source: PubMed Central journal article supplement (PMC10224942; doi:10.1038/s41598-023-35639-x), 2023-05-27

Gene expression of MALAT1 in Breast invasive carcinoma

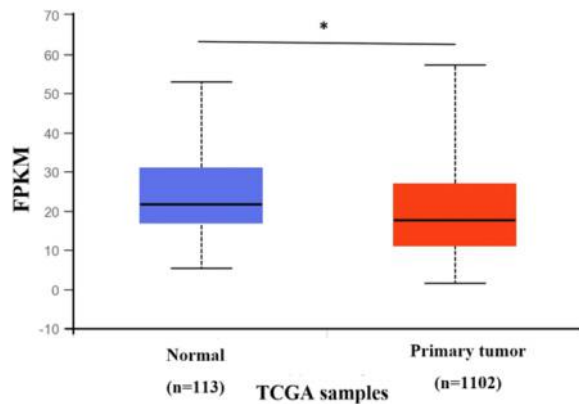

Expression of TOP2A in BRCA based on samples

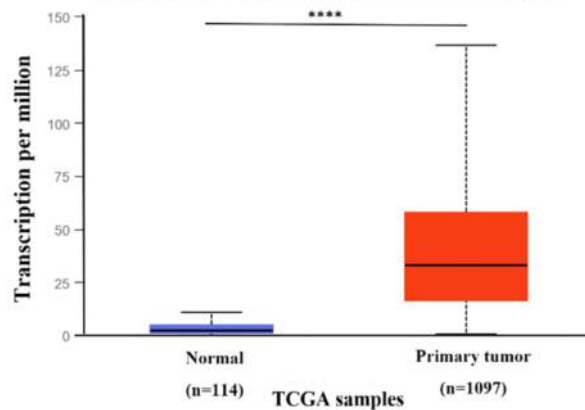

Expression of has-miR-561 in BRCA dataset

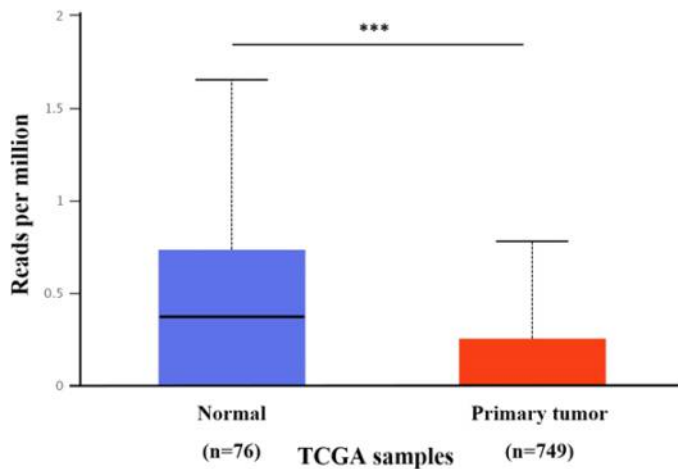

Supplement: 41598_2023_35639_MOESM1_ESM.pdf [file 41598_2023_35639_MOESM1_ESM.pdf]
